# Supplementary material for: Selective Removal of Iron, Lead, and Copper Metal Ions from Industrial Wastewater by a Novel Cross-Linked Carbazole-Piperazine Copolymer
Source: MDPI journal article supplement (doi:10.3390/polym14122486), 2022-06-18
Supplement: s1 [file s1]

# Selective Removal of Iron, Lead, and Copper Metal ions from Industrial Wastewater by a Novel Cross-linked Carbazole-Piperazine Polymer

Majed Al Anazi<sup>1</sup>, Ismael abdulaziz<sup>2</sup>, Othman Charles S. Al Hamouz<sup>\*1,3</sup>

<sup>1</sup>Chemistry Department, King Fahd University of Petroleum and Minerals, Dhahran, 31261, Saudi Arabia.

<sup>2</sup>Interdisciplinary Research Center for membranes and water security, King Fahd University of Petroleum and Minerals, Dhahran, 31261, Saudi Arabia.

<sup>3</sup>Interdisciplinary Research Center for Hydrogen and Energy Storage, King Fahd University of Petroleum and Minerals, Dhahran, 31261, Saudi Arabia.

Corresponding Author E-mail: othmanc@kfupm.edu.sa; (Cell: +966552709130)

## 1. Molecular Simulation

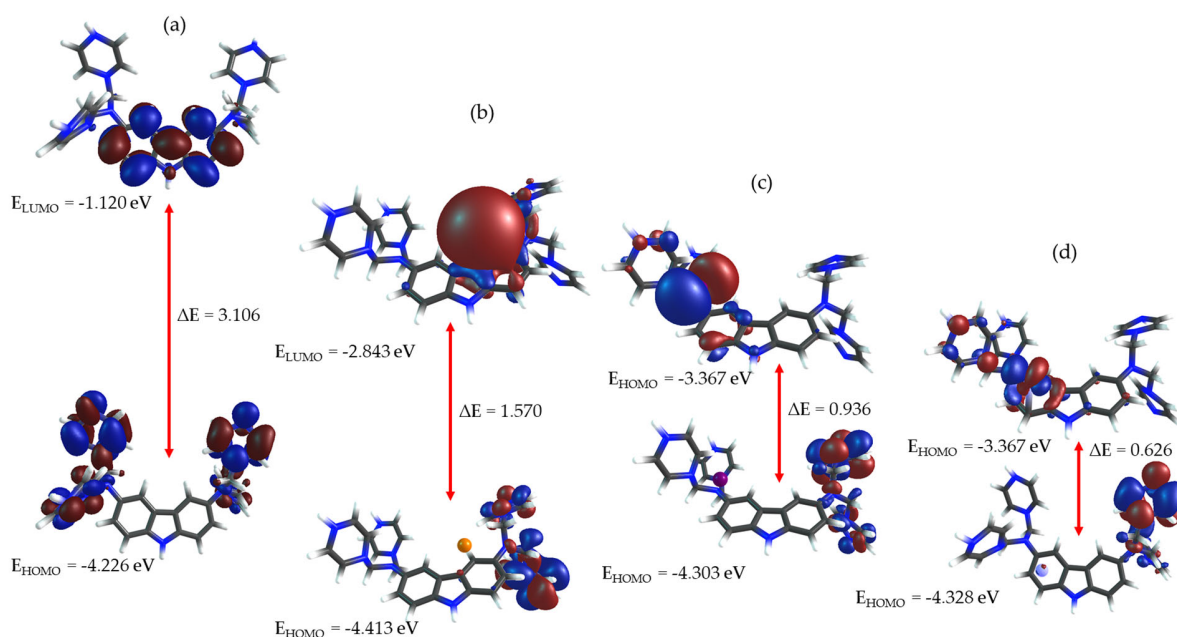

**Figure S1.** The change in frontier molecular orbital distribution of (a) *MXM* when interacting with (b) Cu<sup>2+</sup>, (c) Pb<sup>2+</sup> and (d) Fe<sup>2+</sup> ions at the B3LYP/6-311G\* & SDD levels of theory.

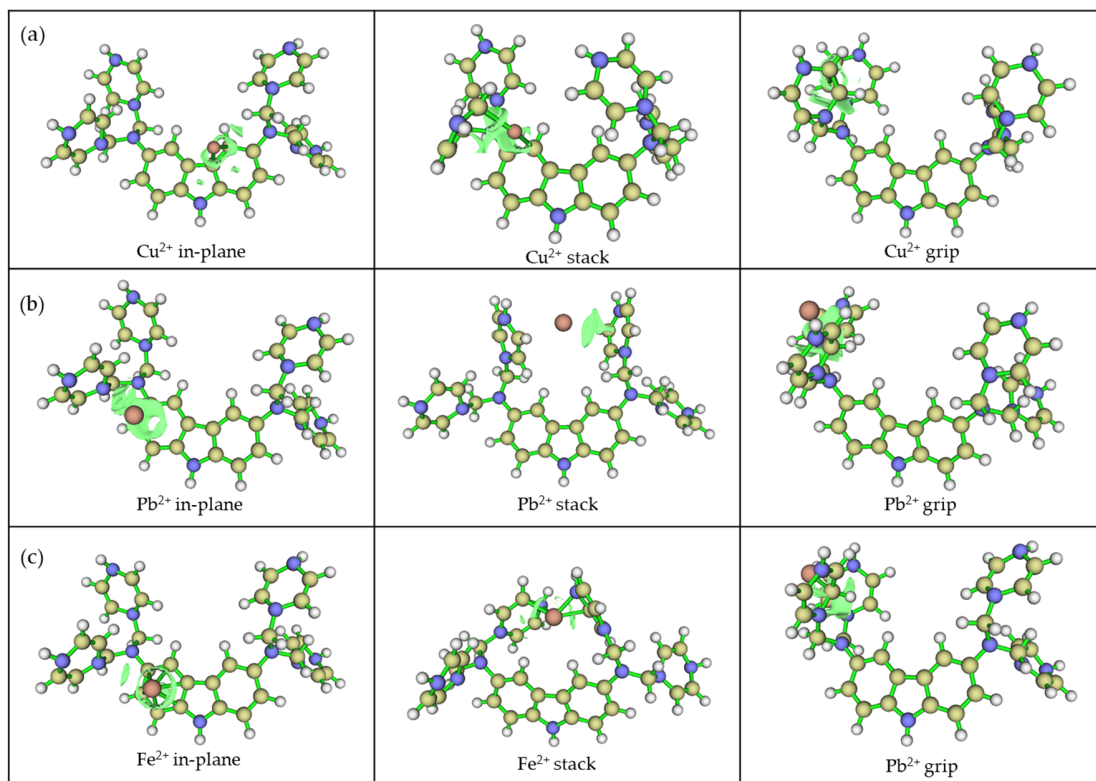

**Figure S2.** The reduced density gradient (RDG) isosurface plots of the interactions of *MXM* with (a) Cu<sup>2+</sup>, (b) Pb<sup>2+</sup> and (c) Fe<sup>2+</sup> ions

## 2. Swelling properties

In a typical experiment; a 0.1 g of *MXM* polymer was weighed before the swelling experiment and was recorded as  $M_o$ . the sample was immersed in distill water for 24 hours. once the time was elapsed the sample surface was dried. The sample was weighed again ( $M_f$ ) and the % swelling was measured as follow:

$$\% \text{ Swelling} = \frac{M_f - M_o}{M_o} * 100 \quad (1)$$

The results reveled that the % swelling was found 15 %.

### 3. Comparison table with literature:

**Table S1.** Comparison between *MXM* and adsorbents for the removal of heavy metal ions.

| Material                                                                           | % Removal |        |      | Reference |
|------------------------------------------------------------------------------------|-----------|--------|------|-----------|
|                                                                                    | Fe        | Pb     | Cu   |           |
| Carbon nanotube/G composite                                                        | -         | -      | 83.3 | [1]       |
| Titanate nanotube/G nanocomposite                                                  | -         | -      | 98   | [2]       |
| Chitosan                                                                           | 99.3      | -      | 90   | [3]       |
| PE/PP non-woven fabric grafted with poly(bis[2-(methacryloyloxy) ethyl] phosphate) | -         | -      | 60   | [4]       |
| $\gamma$ -polyglutamic acid ( $\gamma$ -PGA) functionalized lignin (DLGS)          | -         | 99.24  | 56   | [5]       |
| and $\epsilon$ -poly-L-lysine ( $\epsilon$ -PL) functionalized lignin (DLS)        | -         | 99.04* | 54*  | [5]       |
| poly (hydroxamic acid) ligand                                                      | 99.3      | -      | 90   | [6]       |
| phytic acid-functionalized spherical poly-phenylglycine                            | -         | 95     | 91   | [7]       |
| <i>MXM</i>                                                                         | 100*      | 96*    | 55*  | This work |

\* Mixed metal ion solution

### References

1. Li, Y.; Liu, F.; Xia, B.; Du, Q.; Zhang, P.; Wang, D.; Wang, Z.; Xia, Y., Removal of copper from aqueous solution by carbon nanotube/calcium alginate composites. *Journal of Hazardous Materials* **2010**, 177 (1), 876-880.
2. Esmat, M.; Farghali, A. A.; Khedr, M. H.; El-Sherbiny, I. M., Alginate-based nanocomposites for efficient removal of heavy metal ions. *International Journal of Biological Macromolecules* **2017**, 102, 272-283.

3. Baba, Y.; Masaaki, K.; Kawano, Y., Synthesis of a chitosan derivative recognizing planar metal ion and its selective adsorption equilibria of copper(II) over iron(III)1. *Reactive and Functional Polymers* **1998**, 36 (2), 167-172.
4. Limsuwan, Y.; Rattanawongwiboon, T.; Lertsarawut, P.; Hemvichian, K.; Pongprayoon, T., Adsorption of Cu(II) ions from aqueous solution using PE/PP non-woven fabric grafted with poly(bis[2-(methacryloyloxy) ethyl] phosphate). *Journal of Environmental Chemical Engineering* **2021**, 9 (6), 106440.
5. Lin, X.; Shen, T.; Li, M.; Shaoyu, J.; Zhuang, W.; Li, M.; Xu, H.; Zhu, C.; Ying, H.; Ouyang, P., Synthesis, characterization, and utilization of poly-amino acid-functionalized lignin for efficient and selective removal of lead ion from aqueous solution. *Journal of Cleaner Production* **2022**, 347, 131219.
6. Mzinyane, N. N.; Ofomaja, A. E.; Naidoo, E. B., Synthesis of poly (hydroxamic acid) ligand for removal of Cu (II) and Fe (II) ions in a single component aqueous solution. *South African Journal of Chemical Engineering* **2021**, 35, 137-152.
7. Ben Ali, M.; Wang, F.; Boukherroub, R.; Xia, M., High performance of phytic acid-functionalized spherical poly-phenylglycine particles for removal of heavy metal ions. *Applied Surface Science* **2020**, 518, 146206.
